# Supplementary material
Source: Royal Society of Chemistry journal article supplement (doi:10.1039/d6gc00990e)
Supplement: d6gc00990e1.pdf [file d6gc00990e1.pdf]

## Supplementary Material

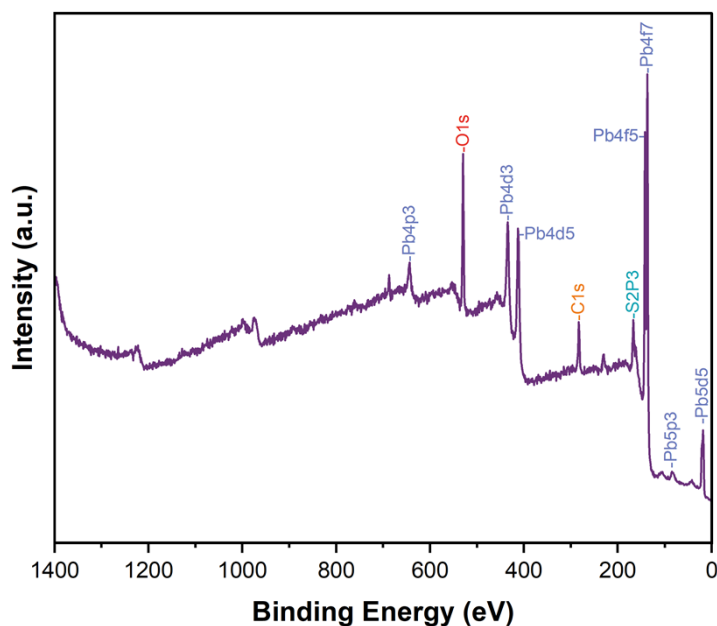

**Figure S1.** The overall spectrum of SLP raw material XPS.

### SPL chemical composition titration method

The chemical composition of spent lead paste (SLP) was analyzed in accordance with the standard method GB/T 23636-2017. The procedures for determining the contents of key lead components are summarized as follows:

1. PbO content

A weighed SLP sample was digested in 5% acetic acid under continuous stirring for 30 minutes. After filtration, the pH of the filtrate was adjusted to 5-6 using ammonia solution. The  $\text{Pb}^{2+}$  content was then determined via titration with 0.05 mol/L EDTA disodium standard solution, using hexamethylenetetramine as buffer and xylenol orange as indicator.

2.  $\text{PbSO}_4$  content

The residue obtained from the PbO analysis was dissolved in 25% NaCl solution with stirring for 1 hour. The resulting solution was similarly buffered to pH 5-6 and titrated with 0.05 mol/L EDTA to determine the  $\text{Pb}^{2+}$  concentration, corresponding to the  $\text{PbSO}_4$  content.

3. Pb content

The free lead content was determined by treating the sample with a boiling acetic

acid–sodium acetate solution to dissolve non-metallic compounds. The residue containing metallic lead was dissolved in dilute nitric acid, and the  $Pb^{2+}$  was titrated at pH 5-6 with 0.02 mol/L EDTA using xylenol orange as indicator.

#### 4. $PbO_2$ content

The sample was dissolved in nitric acid with the addition of hydrogen peroxide, whereby  $PbO_2$  was reduced and produced peroxide consumed in the reaction. The excess hydrogen peroxide was titrated with potassium permanganate, allowing the calculation of  $PbO_2$  content based on the oxidant consumption.

## Thermodynamic calculation process

### In Situ Reduction Sulfidation of Lead Paste and Theoretical Thermodynamics

The conversion of lead paste is carried out in a hydrogen peroxide–sulfuric acid system, where  $PbO_2$ ,  $PbO$ , and  $Pb$  are transformed into  $PbSO_4$ . The thermodynamics of the sulfidation conversion process can be summarized by calculating the Pourbaix E-pH diagram of the Pb-S- $H_2O_2$ - $H_2O$  system.

In hydrometallurgical processes, all chemical reactions can be simplified as:

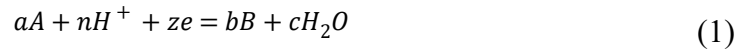

In the equation,  $a$ ,  $n$ ,  $b$ , and  $c$  represent the stoichiometric coefficients of  $A$ ,  $H^+$ ,  $B$ , and  $H_2O$  in the chemical reaction, respectively, and  $z$  is the number of electrons transferred in the reaction. The Gibbs free energy of reaction can be calculated using Eq. (2):

$$\Delta_r G_T^\ominus = c.G_{H_2O,f,T}^\ominus + b.G_{B,f,T}^\ominus - z.G_{e,f,T}^\ominus - n.G_{H^+,f,T}^\ominus - a.G_{A,f,T}^\ominus \quad (2)$$

In Eq. (2),  $\Delta_r G_T^\ominus$  represents the standard Gibbs free energy of the chemical reaction shown in (2), and  $G_{i,f,T}^\ominus$  denotes the standard Gibbs free energy of formation of various substances at temperature  $T$ . According to the van't Hoff isotherm,  $\Delta_r G_T$  can be expressed by the following equation:

$$\Delta_r G_T = \Delta_r G_T^\ominus + RT \ln \frac{a_B^b}{(a_A^a \cdot a_{H^+}^n)} \quad (3)$$

Since  $-\ln a_{H^+}^n = pH$ , Eq. (3) can be rewritten as:

$$\Delta_r G_T = \Delta_r G_T^\ominus + RT \ln \left( \frac{a_B^b}{a_A^a} \right) + 2.303 RT \cdot pH \quad (4)$$

$$\Delta_r G_T = -zFE_T \quad (5)$$

$$\Delta_r G_T^\ominus = -zFE_T^\ominus \quad (6)$$

Here,  $E_T$  and  $E_T^\ominus$  represent the electrode potential and the standard electrode potential of the chemical reaction at a specific temperature, respectively;  $F$  is the Faraday constant ( $F = 96,500 \text{ C/mol}$ );  $R$  is the molar gas constant ( $R = 8.314 \text{ J/(mol}\cdot\text{K)}$ ); and  $a_A$  and  $a_B$  are the activities of species A and B, respectively. By combining Equations (4), (5), and (6), the following relationship can be derived:

$$-zFE_T = -zFE_T^\ominus + 2.30RT \ln \left( \frac{a_B^b}{a_A^a} \right) + 2.30RT \text{pH} \quad (7)$$

The chemical reaction shown in Equation (1) can be classified into the following three types based on the substances involved:

(1) Reactions involving  $H^+$  but no electron transfer (i.e.,  $z = 0, n \neq 0$ ). In this case, Equation (7) can be expressed as:

$$\text{pH} = \frac{\Delta_r G_T^\ominus}{2.30RT} - \frac{1}{n} \lg \left( \frac{a_B^b}{a_A^a} \right) \quad (8)$$

(2) For a reaction without  $H^+$  and with electron transfer, that is, a reaction where  $z \neq 0$  and  $n = 0$ , equation (7) can be expressed by the following formula:

$$E_T = E_T^\ominus - \frac{2.30RT}{zF} \lg \left( \frac{a_B^b}{a_A^a} \right) \quad (9)$$

(3) Since there are reactions involving  $H^+$  and electron transfer, that is, reactions where  $z \neq 0$  and  $n \neq 0$ , equation (8) can be expressed by the following formula:

$$E_T = E_T^\ominus - \frac{2.30RT}{zF} \lg \left( \frac{a_B^b}{a_A^a} \right) - \frac{2.30RT}{zF} n \cdot \text{pH} \quad (10)$$

Therefore, as long as the standard Gibbs free energy generated by each substance in the REDOX reaction is obtained, the E-pH diagram of the aqueous solution system at a certain concentration can be plotted according to the equations listed in (8), (9), and (10).

During the transformation process of lead paste, the possible species of lead that may exist include  $\text{Pb}$ 、 $\text{PbO}$ 、 $\text{PbO}_2$ 、 $\text{PbSO}_4$ 、 $\text{Pb}^{2+}$ 、 $\text{Pb}^{4+}$ 、 $\text{PbO}_4^{4-}$ 、 $\text{HPbO}_2^-$ 、 $\text{PbO}_3^{2-}$ 、 $\text{Pb}_2\text{O}_3$ 、 $\text{Pb}_3\text{O}_4$ . The thermodynamic data of the corresponding species are listed (Table S1).

**Table S1.** Main phases and thermodynamic data existing in the Pb-S-H<sub>2</sub>O<sub>2</sub>-H<sub>2</sub>O system

| Species                 | $G_{f,T}^{\ominus}$ (kJ/mol) |         |         | Species                            | $G_{f,T}^{\ominus}$ (kJ/mol) |         |         |
|-------------------------|------------------------------|---------|---------|------------------------------------|------------------------------|---------|---------|
|                         | 298 K                        | 323 K   | 348 K   |                                    | 298 K                        | 323 K   | 348 K   |
| <i>Pb</i>               | -19.32                       | -20.97  | -22.67  | <i>PbO</i>                         | -238.66                      | -240.37 | -242.17 |
| <i>PbO</i>              | -238.66                      | -240.37 | -242.17 | <i>PbO<sub>2</sub></i>             | -295.88                      | -297.73 | -299.72 |
| <i>PbO<sub>2</sub></i>  | -295.88                      | -297.73 | -299.72 | <i>PbSO<sub>4</sub></i>            | -964.21                      | -968.03 | -972.05 |
| <i>PbSO<sub>4</sub></i> | -964.21                      | -968.03 | -972.05 | <i>Pb<sup>2+</sup></i>             | 8.12                         | 8.54    | 8.58    |
| <i>Pb<sup>2+</sup></i>  | 8.12                         | 8.54    | 8.58    | <i>Pb<sup>4+</sup></i>             | 302.50                       | -       | -       |
| <i>Pb<sup>4+</sup></i>  | 302.50                       | -       | -       | <i>H<sub>2</sub>O<sub>2</sub></i>  | -220.55                      | -223.38 | -226.38 |
| <i>H<sup>+</sup></i>    | 6.24                         | 6.64    | 6.79    | <i>H<sub>2</sub>O</i>              | -306.68                      | -308.45 | -310.42 |
| <i>e</i>                | -25.70                       | -27.75  | -29.58  | <i>SO<sub>4</sub><sup>2-</sup></i> | -928.07                      | -292.22 | -292.61 |
| <i>O<sub>2</sub></i>    | -61.13                       | -66.29  | -71.50  | <i>H<sub>2</sub>S</i>              | -82.30                       | -87.47  | -92.71  |
| <i>H<sub>2</sub></i>    | -38.93                       | -42.22  | -45.57  | <i>SO<sub>2</sub></i>              | -371.28                      | -377.28 | -383.61 |

Note: The "e" in the table represents the electrons that participate in chemical reactions.

### Thermodynamic Equations in the Pb-S-H<sub>2</sub>O<sub>2</sub>-H<sub>2</sub>O System

The standard electrode potentials and pH values at different temperatures were calculated. By substituting the calculated standard electrode potentials or pH values into Equation (8), (9), or (10), the thermodynamic equilibrium equations for the Pb-S-H<sub>2</sub>O<sub>2</sub>-H<sub>2</sub>O system at various temperatures can be derived. Based on the equilibrium Equations (6) and (9), the standard electrode potentials and pH values for each reaction at 298 K, 323 K, and 348 K were computed. The possible thermodynamic equations involved in the Pb-S-H<sub>2</sub>O<sub>2</sub>-H<sub>2</sub>O system are summarized in Table S2.

**Table S2.** Electrode reactions and standard electrode potential values at different temperatures in the Pb-S-H<sub>2</sub>O<sub>2</sub>-H<sub>2</sub>O system during the conversion process of SLP.

| No | Reaction                                             | E-pH equation                                                                                                                               | $E_T^{\ominus}$ or pH |         |        |
|----|------------------------------------------------------|---------------------------------------------------------------------------------------------------------------------------------------------|-----------------------|---------|--------|
|    |                                                      |                                                                                                                                             | 298K                  | 223K    | 248K   |
| 1  | $2H^+ + 2e = H_2$                                    | $E_T = E_T^{\ominus} - \frac{2.303RT}{F} \lg\left(\frac{p_{H_2}}{p^{\ominus}}\right) - \frac{2.303RT}{F} pH$                                | 0                     | 0       | 0      |
| 2  | $O_2 + 4H^+ + 4e = 2H_2O$                            | $E_T = E_T^{\ominus} + \frac{2.303RT}{4F} \lg\left(\frac{p_{O_2}}{p^{\ominus}}\right) - \frac{2.303RT}{F} pH$                               | 1.229                 | 1.208   | 1.187  |
| 3  | $Pb + 2H^+ + S O_4^{2-} = PbSO_4 + H_2$              | $pH = \frac{-\Delta_r G_T^{\ominus}}{2.303RT} + \frac{1}{2} \lg(a_{S O_4^{2-}})$                                                            | -5.980                | -5.931  | -5.925 |
| 4  | $4Pb + 10H^+ + 5S O_4^{2-} = 4PbSO_4 + 4H_2O + H_2S$ | $pH = \frac{-\Delta_r G_T^{\ominus}}{2.303RT} - \frac{1}{10} \lg\left(\frac{p_{H_2}}{p^{\ominus}}\right) + \frac{1}{2} \lg(a_{S O_4^{2-}})$ | -8.951                | -8.571  | -8.284 |
| 5  | $Pb + 4H^+ + 2S O_4^{2-} = PbSO_4 + 2H_2O + SO_2$    | $pH = \frac{-\Delta_r G_T^{\ominus}}{2.303RT} - \frac{1}{4} \lg\left(\frac{p_{H_2}}{p^{\ominus}}\right) + \frac{1}{2} \lg(a_{S O_4^{2-}})$  | -4.230                | -4.425  | -4.571 |
| 6  | $Pb + 2H^+ + S O_4^{2-} + H_2O_2 = PbSO_4 + 2H_2O$   | $pH = \frac{-\Delta_r G_T^{\ominus}}{2.303RT} + \frac{1}{2} \lg(a_{S O_4^{2-}} \cdot a_{H_2O_2})$                                           | -37.000               | -34.345 | -      |

|    |                                                            |                                                                                                                                 |         |         |        |        |
|----|------------------------------------------------------------|---------------------------------------------------------------------------------------------------------------------------------|---------|---------|--------|--------|
| 7  | $P b + 2H^+ + H_2O_2 = P \beta^+ + 2H_2O$                  | $pH = \frac{-\Delta_r G_T^0}{2.303RT} - \frac{1}{2} \lg(a_{P\beta^+}) + \frac{1}{2} \lg(a_{H_2O_2})$                            | -33.117 | -30.517 | -      | 28.281 |
| 8  | $P b O + 2H^+ + 2e = P b + H_2O$                           | $E_T = E_T^0 - \frac{2.303RT}{F} pH$                                                                                            | 0.251   | 0.243   | 0.235  |        |
| 9  | $P b O + 2H^+ + S \bar{O}_4^- = P b S Q + H_2O$            | $pH = \frac{-\Delta_r G_T^0}{2.303RT} + \frac{1}{2} \lg(a_{S\bar{O}_4^-})$                                                      | -10.223 | -9.721  | -9.328 |        |
| 10 | $P b Q + H^+ + 2e = HP b \bar{O}_2$                        | $E_T = E_T^0 - \frac{2.303RT}{2F} \lg(a_{HP b \bar{O}_2}) - \frac{2.303RT}{2F} pH$                                              | 0.639   | 0.617   | 0.592  |        |
| 11 | $2P b Q + 2H^+ + 2e = P b_2O_3 + H_2O$                     | $E_T = E_T^0 - \frac{2.303RT}{F} pH$                                                                                            | 1.075   | -       | -      |        |
| 12 | $P b Q + 4H^+ + 2e = P \beta^+ + 2H_2O$                    | $E_T = E_T^0 - \frac{2.303RT}{2F} \lg(a_{P\beta^+}) - \frac{2.303RT}{F} 2pH$                                                    | 1.466   | 1.460   | 1.454  |        |
| 13 | $P b Q + H_2O = P b \bar{O}_3^- + 2H^+$                    | $pH = \frac{-\Delta_r G_T^0}{2.303RT} - \frac{1}{2} \lg(a_{P b \bar{O}_3^-})$                                                   | 15.349  | 14.567  | 13.955 |        |
| 14 | $P b O + H_2O = HP b \bar{O}_2 + H^+$                      | $pH = \frac{-\Delta_r G_T^0}{2.303RT} - \lg(a_{HP b \bar{O}_2})$                                                                | 15.285  | 14.530  | 13.969 |        |
| 15 | $3P b Q + 4H^+ + 4e = P b_3O_4 + 2H_2O$                    | $E_T = E_T^0 - \frac{2.303RT}{F} pH$                                                                                            | 1.114   | 1.106   | 1.098  |        |
| 16 | $P b Q + S \bar{O}_4^- + 4H^+ + 2e = P b S Q + 2H_2O$      | $E_T = E_T^0 + \frac{2.303RT}{2F} \lg(a_{S\bar{O}_4^-}) - \frac{2.303RT}{F} 2pH$                                                | 1.696   | 1.706   | 1.718  |        |
| 17 | $P b Q + H_2O_2 + 2H^+ = P \beta^+ + 2H_2O + O_2$          | $pH = \frac{-\Delta_r G_T^0}{2.303RT} - \frac{1}{2} \lg\left(\frac{a_{P\beta^+}}{a_{H_2O_2}}\right)$                            | -14.237 | -13.497 | -12.85 |        |
| 18 | $P b Q + P b + 4H^+ = 2P \beta^+ + 2H_2O$                  | $pH = \frac{-\Delta_r G_T^0}{2.303RT} - \frac{1}{2} \lg(a_{P\beta^+})$                                                          | -13.449 | -12.444 | -11.58 |        |
| 19 | $P \beta^+ + 2e = P b$                                     | $E_T = E_T^0 + \frac{2.303RT}{2F} \lg(a_{P\beta^+})$                                                                            | -0.124  | -0.135  | -0.145 |        |
| 20 | $P \beta^+ + H_2O = P b O + 2H^+$                          | $pH = \frac{-\Delta_r G_T^0}{2.303RT} + \frac{1}{2} \lg(a_{P\beta^+})$                                                          | 6.344   | 6.893   | 5.499  |        |
| 21 | $P \beta^+ + 2H_2O = HP b \bar{O}_2 + 3H^+$                | $pH = \frac{-\Delta_r G_T^0}{2.303RT} - \frac{1}{3} \lg\left(\frac{a_{HP b \bar{O}_2}}{a_{P\beta^+}}\right)$                    | 9.325   | 8.772   | 8.322  |        |
| 22 | $P \beta^+ + H_2O_2 + 2H^+ = P \beta^+ + 2H_2O$            | $pH = \frac{-\Delta_r G_T^0}{2.303RT} - \frac{1}{2} \lg\left(\frac{a_{P\beta^+}}{a_{H_2O_2}}\right)$                            | -9.721  | -       | -      |        |
| 23 | $P \beta^+ + 2e = P \beta^+$                               | $E_T = E_T^0 - \frac{2.303RT}{2F} \lg\left(\frac{a_{P\beta^+}}{a_{P\beta^+}}\right)$                                            | 1.259   | -       | -      |        |
| 24 | $P \beta^+ + 2H_2O = P b Q + 4H^+$                         | $pH = \frac{-\Delta_r G_T^0}{2.303 \times 4RT} + \frac{1}{4} \lg(a_{P\beta^+})$                                                 | 1.750   |         |        |        |
| 25 | $P \beta^+ + H_2O_2 + 4e = P b O + 2H_2O$                  | $E_T = E_T^0 + \frac{2.303RT}{4F} \lg(a_{P\beta^+} \cdot a_{H_2O_2})$                                                           | 2.154   | -       | -      |        |
| 26 | $P \beta^+ + S \bar{O}_4^- + 2e = P b S Q$                 | $E_T = E_T^0 - \frac{2.303RT}{2F} \lg(a_{P\beta^+} \cdot a_{S\bar{O}_4^-})$                                                     | 1.489   | -       | -      |        |
| 27 | $P \beta^+ + 3H_2O = P b \bar{O}_3^- + 6H^+$               | $pH = \frac{-\Delta_r G_T^0}{2.303 \times 6RT} - \frac{1}{6} \lg\left(\frac{a_{P\beta^+}}{a_{P b \bar{O}_3^-}}\right)$          | 6.283   |         |        |        |
| 28 | $HP b \bar{O}_2 + 3H^+ + 2e = P b + 2H_2O$                 | $E_T = E_T^0 + \frac{2.303RT}{2F} \lg(a_{HP b \bar{O}_2}) - \frac{2.303RT}{2F} 3pH$                                             | 0.703   | 0.708   | 0.717  |        |
| 29 | $2HP b \bar{O}_2 + H_2O_2 + 2H^+ = P b_2O_3 + 3H_2O$       | $pH = \frac{-\Delta_r G_T^0}{2.303RT} + \frac{1}{2} \lg\left(\frac{a_{P b_2O_3} \cdot a_{H_2O_2}}{a_{HP b \bar{O}_2}^2}\right)$ | -27.585 | -       | -      |        |
| 30 | $P b \bar{O}_3^- + 3H^+ + 2e = HP b \bar{O}_2 + H_2O$      | $E_T = E_T^0 - \frac{2.303RT}{2F} \lg\left(\frac{a_{HP b \bar{O}_2}}{a_{P b \bar{O}_3^-}}\right) - \frac{2.303RT}{2F} 3pH$      | 1.547   | 1.551   | 1.556  |        |
| 31 | $P b \bar{O}_3^- + 6H^+ + 2e = P \beta^+ + 3H_2O$          | $E_T = E_T^0 - \frac{2.303RT}{2F} \lg\left(\frac{a_{P\beta^+}}{a_{P b \bar{O}_3^-}}\right) - \frac{2.303RT}{F} 3pH$             | 2.374   | 2.394   | 2.417  |        |
| 32 | $2P b \bar{O}_3^- + 6H^+ + 2e = P b_2O_3 + 3H_2O$          | $E_T = E_T^0 + \frac{2.303RT}{F} \lg(a_{P b_2O_3}) - \frac{2.303RT}{F} 3pH$                                                     | 2.890   | -       | -      |        |
| 33 | $3P b \bar{O}_3^- + 10H^+ + 4e = P b_3O_4 + 5H_2O$         | $E_T = E_T^0 + \frac{2.303RT}{4F} \lg(a_{P b_3O_4}) - \frac{2.303RT}{4F} 10pH$                                                  | 2.475   | 2.506   | 2.543  |        |
| 34 | $3P b_2O_3 + 2H^+ + 2e = 2P b_3O_4 + H_2O$                 | $E_T = E_T^0 - \frac{2.303RT}{F} pH$                                                                                            | 1.228   | -       | -      |        |
| 35 | $P b_2O_3 + 6H^+ + 2e = 2P \beta^+ + 3H_2O$                | $E_T = E_T^0 - \frac{2.303RT}{F} 3pH$                                                                                           | 1.857   | -       | -      |        |
| 36 | $P b_2O_3 + 2H^+ + 2e = 2P b O + H_2O$                     | $E_T = E_T^0 - \frac{2.303RT}{F} pH$                                                                                            | 1.107   | -       | -      |        |
| 37 | $P b_2O_3 + H_2O_2 + 2H^+ + 4e = 2HP b \bar{O}_2 + H_2O$   | $E_T = E_T^0 - \frac{2.303RT}{4F} \lg\left(\frac{a_{HP b \bar{O}_2}}{a_{H_2O_2}}\right) - \frac{2.303RT}{2F} pH$                | 1.018   | -       | -      |        |
| 38 | $P b_2O_3 + 2S \bar{O}_4^- + 6H^+ + 2e = 2P b S Q + 3H_2O$ | $E_T = E_T^0 + \frac{2.303RT}{F} \lg(a_{S\bar{O}_4^-}) - \frac{2.303RT}{F} 3pH$                                                 | 2.315   | -       | -      |        |

|    |                                          |                                                                              |        |        |        |
|----|------------------------------------------|------------------------------------------------------------------------------|--------|--------|--------|
| 39 | $Pb_3O_4 + 2H^+ + 2e = 3Pb + H_2O$       | $E_T = E_T^0 - \frac{2.303RT}{F}pH$                                          | 1.046  | 1.037  | 1.027  |
| 40 | $Pb_3O_4 + 2H_2O + 2e = 3HPbO_2 + H^+$   | $E_T = E_T^0 - \frac{2.303RT}{2F} \ln(ga_{HPbO_2}^3) - \frac{2.303RT}{2F}pH$ | -0.310 | -0.360 | -0.420 |
| 41 | $Pb_3O_4 + 8H^+ + 2e = 3Pb^{2+} + 4H_2O$ | $E_T = E_T^0 - \frac{2.303RT}{2F} \ln(ga_{Pb^{2+}}^3) - \frac{2.303RT}{F}pH$ | 2.171  | 2.169  | 2.166  |
| 42 | $Pb_3O_4 + H_2O_2 + H^+ + 4e = 3HPbO_2$  | $E_T = E_T^0 + \frac{2.303RT}{4F} \ln(ga_{H_2O_2}) - \frac{2.303RT}{4F}pH$   | 0.762  | 0.730  | 0.694  |

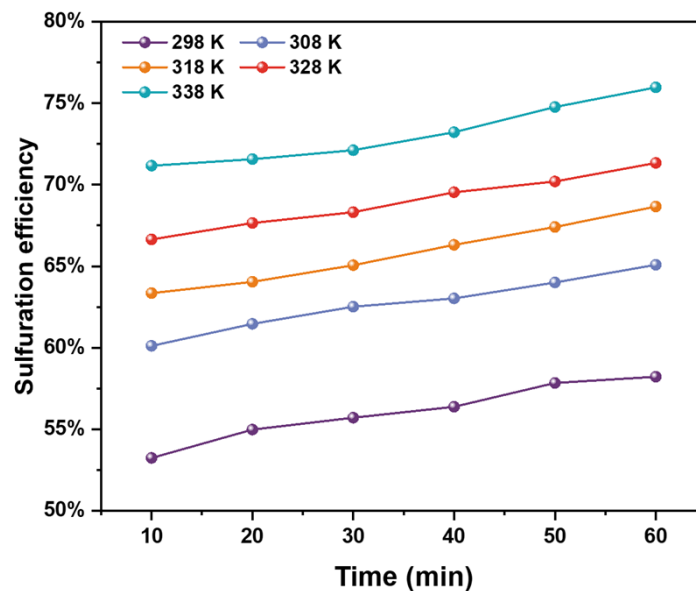

**Figure S2.** Conventional conversion tests on the vulcanization efficiency of SLP at different temperatures and times

**Table S3.** The full experimental dataset comprising 399 independent runs used for ANN training and validation.

|    | Temperature(K) | liquid-Solid ratio(ml/g) | Molar ratio of $H_2O_2$ to $Pb^{4+}$ | Molar ratio of $H_2SO_4$ to $Pb^{2+}$ | Ultrasonic power (W) | Sulfuration efficiency |
|----|----------------|--------------------------|--------------------------------------|---------------------------------------|----------------------|------------------------|
| 1  | 328            | 20                       | 2                                    | 1.5                                   | 500                  | 98.89%                 |
| 2  | 328            | 20                       | 2                                    | 1.5                                   | 500                  | 98.23%                 |
| 3  | 328            | 20                       | 2                                    | 1.5                                   | 500                  | 98.32%                 |
| 4  | 348            | 20                       | 2                                    | 1.5                                   | 500                  | 98.34%                 |
| 5  | 348            | 20                       | 2                                    | 1.5                                   | 500                  | 95.76%                 |
| 6  | 348            | 20                       | 2                                    | 1.5                                   | 500                  | 95.76%                 |
| 7  | 328            | 40                       | 2                                    | 1.5                                   | 500                  | 86.95%                 |
| 8  | 328            | 40                       | 2                                    | 1.5                                   | 500                  | 91.16%                 |
| 9  | 328            | 40                       | 2                                    | 1.5                                   | 500                  | 91.16%                 |
| 10 | 348            | 40                       | 2                                    | 1.5                                   | 500                  | 85.20%                 |

|    |     |    |      |      |     |        |
|----|-----|----|------|------|-----|--------|
| 11 | 348 | 40 | 2    | 1.5  | 500 | 82.16% |
| 12 | 348 | 40 | 2    | 1.5  | 500 | 83.68% |
| 13 | 338 | 30 | 1.75 | 1.25 | 500 | 90.04% |
| 14 | 338 | 30 | 1.75 | 1.25 | 500 | 88.56% |
| 15 | 338 | 30 | 1.75 | 1.25 | 500 | 85.60% |
| 16 | 338 | 30 | 2.25 | 1.25 | 500 | 88.91% |
| 17 | 338 | 30 | 2.25 | 1.25 | 500 | 90.40% |
| 18 | 338 | 30 | 2.25 | 1.25 | 500 | 85.95% |
| 19 | 338 | 30 | 1.75 | 1.75 | 500 | 84.83% |
| 20 | 338 | 30 | 1.75 | 1.75 | 500 | 83.34% |
| 21 | 338 | 30 | 1.75 | 1.75 | 500 | 81.86% |
| 22 | 338 | 30 | 2.25 | 1.75 | 500 | 90.58% |
| 23 | 338 | 30 | 2.25 | 1.75 | 500 | 96.47% |
| 24 | 338 | 30 | 2.25 | 1.75 | 500 | 89.11% |
| 25 | 338 | 20 | 2    | 1.5  | 400 | 91.13% |
| 26 | 338 | 20 | 2    | 1.5  | 400 | 84.12% |
| 27 | 338 | 20 | 2    | 1.5  | 400 | 91.13% |
| 28 | 338 | 40 | 2    | 1.5  | 400 | 83.63% |
| 29 | 338 | 40 | 2    | 1.5  | 400 | 85.03% |
| 30 | 338 | 40 | 2    | 1.5  | 400 | 86.42% |
| 31 | 338 | 20 | 2    | 1.5  | 600 | 92.76% |
| 32 | 338 | 20 | 2    | 1.5  | 600 | 94.21% |
| 33 | 338 | 20 | 2    | 1.5  | 600 | 94.21% |
| 34 | 338 | 40 | 2    | 1.5  | 600 | 86.06% |
| 35 | 338 | 40 | 2    | 1.5  | 600 | 87.49% |
| 36 | 338 | 40 | 2    | 1.5  | 600 | 87.49% |
| 37 | 328 | 30 | 1.75 | 1.5  | 500 | 92.09% |
| 38 | 328 | 30 | 1.75 | 1.5  | 500 | 97.78% |
| 39 | 328 | 30 | 1.75 | 1.5  | 500 | 94.94% |
| 40 | 348 | 30 | 1.75 | 1.5  | 500 | 88.99% |
| 41 | 348 | 30 | 1.75 | 1.5  | 500 | 93.25% |
| 42 | 348 | 30 | 1.75 | 1.5  | 500 | 90.41% |
| 43 | 328 | 30 | 2.25 | 1.5  | 500 | 89.18% |
| 44 | 328 | 30 | 2.25 | 1.5  | 500 | 94.77% |
| 45 | 328 | 30 | 2.25 | 1.5  | 500 | 93.37% |
| 46 | 348 | 30 | 2.25 | 1.5  | 500 | 95.75% |
| 47 | 348 | 30 | 2.25 | 1.5  | 500 | 94.32% |
| 48 | 348 | 30 | 2.25 | 1.5  | 500 | 94.32% |
| 49 | 338 | 30 | 2    | 1.25 | 400 | 89.54% |

|    |     |    |      |      |     |        |
|----|-----|----|------|------|-----|--------|
| 50 | 338 | 30 | 2    | 1.25 | 400 | 90.89% |
| 51 | 338 | 30 | 2    | 1.25 | 400 | 89.54% |
| 52 | 338 | 30 | 2    | 1.75 | 400 | 92.77% |
| 53 | 338 | 30 | 2    | 1.75 | 400 | 88.48% |
| 54 | 338 | 30 | 2    | 1.75 | 400 | 88.48% |
| 55 | 338 | 30 | 2    | 1.25 | 600 | 87.70% |
| 56 | 338 | 30 | 2    | 1.25 | 600 | 89.16% |
| 57 | 338 | 30 | 2    | 1.25 | 600 | 87.70% |
| 58 | 338 | 30 | 2    | 1.75 | 600 | 91.16% |
| 59 | 338 | 30 | 2    | 1.75 | 600 | 94.14% |
| 60 | 338 | 30 | 2    | 1.75 | 600 | 91.16% |
| 61 | 338 | 20 | 1.75 | 1.5  | 500 | 99.35% |
| 62 | 338 | 20 | 1.75 | 1.5  | 500 | 95.04% |
| 63 | 338 | 20 | 1.75 | 1.5  | 500 | 95.04% |
| 64 | 338 | 40 | 1.75 | 1.5  | 500 | 88.04% |
| 65 | 338 | 40 | 1.75 | 1.5  | 500 | 85.01% |
| 66 | 338 | 40 | 1.75 | 1.5  | 500 | 92.59% |
| 67 | 338 | 20 | 2.25 | 1.5  | 500 | 92.18% |
| 68 | 338 | 20 | 2.25 | 1.5  | 500 | 92.18% |
| 69 | 338 | 20 | 2.25 | 1.5  | 500 | 92.18% |
| 70 | 338 | 40 | 2.25 | 1.5  | 500 | 87.53% |
| 71 | 338 | 40 | 2.25 | 1.5  | 500 | 90.35% |
| 72 | 338 | 40 | 2.25 | 1.5  | 500 | 90.35% |
| 73 | 328 | 30 | 2    | 1.25 | 500 | 91.61% |
| 74 | 328 | 30 | 2    | 1.25 | 500 | 87.36% |
| 75 | 328 | 30 | 2    | 1.25 | 500 | 90.19% |
| 76 | 348 | 30 | 2    | 1.25 | 500 | 82.43% |
| 77 | 348 | 30 | 2    | 1.25 | 500 | 82.43% |
| 78 | 348 | 30 | 2    | 1.25 | 500 | 83.89% |
| 79 | 328 | 30 | 2    | 1.75 | 500 | 91.94% |
| 80 | 328 | 30 | 2    | 1.75 | 500 | 91.94% |
| 81 | 328 | 30 | 2    | 1.75 | 500 | 93.42% |
| 82 | 348 | 30 | 2    | 1.75 | 500 | 96.24% |
| 83 | 348 | 30 | 2    | 1.75 | 500 | 93.40% |
| 84 | 348 | 30 | 2    | 1.75 | 500 | 90.55% |
| 85 | 338 | 30 | 1.75 | 1.5  | 400 | 83.96% |
| 86 | 338 | 30 | 1.75 | 1.5  | 400 | 88.20% |
| 87 | 338 | 30 | 1.75 | 1.5  | 400 | 82.55% |
| 88 | 338 | 30 | 2.25 | 1.5  | 400 | 84.83% |

|     |     |    |      |      |     |        |
|-----|-----|----|------|------|-----|--------|
| 89  | 338 | 30 | 2.25 | 1.5  | 400 | 86.23% |
| 90  | 338 | 30 | 2.25 | 1.5  | 400 | 91.82% |
| 91  | 338 | 30 | 1.75 | 1.5  | 600 | 86.66% |
| 92  | 338 | 30 | 1.75 | 1.5  | 600 | 86.66% |
| 93  | 338 | 30 | 1.75 | 1.5  | 600 | 85.21% |
| 94  | 338 | 30 | 2.25 | 1.5  | 600 | 87.15% |
| 95  | 338 | 30 | 2.25 | 1.5  | 600 | 88.60% |
| 96  | 338 | 30 | 2.25 | 1.5  | 600 | 92.96% |
| 97  | 328 | 30 | 2    | 1.5  | 400 | 83.79% |
| 98  | 328 | 30 | 2    | 1.5  | 400 | 86.59% |
| 99  | 328 | 30 | 2    | 1.5  | 400 | 86.59% |
| 100 | 348 | 30 | 2    | 1.5  | 400 | 93.40% |
| 101 | 348 | 30 | 2    | 1.5  | 400 | 97.70% |
| 102 | 348 | 30 | 2    | 1.5  | 400 | 91.96% |
| 103 | 328 | 30 | 2    | 1.5  | 600 | 91.67% |
| 104 | 328 | 30 | 2    | 1.5  | 600 | 94.51% |
| 105 | 328 | 30 | 2    | 1.5  | 600 | 90.25% |
| 106 | 348 | 30 | 2    | 1.5  | 600 | 96.67% |
| 107 | 348 | 30 | 2    | 1.5  | 600 | 96.67% |
| 108 | 348 | 30 | 2    | 1.5  | 600 | 98.08% |
| 109 | 338 | 20 | 2    | 1.25 | 500 | 97.47% |
| 110 | 338 | 20 | 2    | 1.25 | 500 | 98.90% |
| 111 | 338 | 20 | 2    | 1.25 | 500 | 98.90% |
| 112 | 338 | 40 | 2    | 1.25 | 500 | 97.34% |
| 113 | 338 | 40 | 2    | 1.25 | 500 | 98.77% |
| 114 | 338 | 40 | 2    | 1.25 | 500 | 95.91% |
| 115 | 338 | 20 | 2    | 1.75 | 500 | 97.32% |
| 116 | 338 | 20 | 2    | 1.75 | 500 | 98.80% |
| 117 | 338 | 20 | 2    | 1.75 | 500 | 98.80% |
| 118 | 338 | 40 | 2    | 1.75 | 500 | 85.70% |
| 119 | 338 | 40 | 2    | 1.75 | 500 | 87.10% |
| 120 | 338 | 40 | 2    | 1.75 | 500 | 89.88% |
| 121 | 338 | 30 | 2    | 1.5  | 500 | 99.67% |
| 122 | 338 | 30 | 2    | 1.5  | 500 | 96.84% |
| 123 | 338 | 30 | 2    | 1.5  | 500 | 98.25% |
| 124 | 338 | 30 | 2    | 1.5  | 500 | 99.12% |
| 125 | 338 | 30 | 2    | 1.5  | 500 | 99.12% |
| 126 | 338 | 30 | 2    | 1.5  | 500 | 99.12% |
| 127 | 338 | 30 | 2    | 1.5  | 500 | 98.62% |

|     |     |    |      |     |     |        |
|-----|-----|----|------|-----|-----|--------|
| 128 | 338 | 30 | 2    | 1.5 | 500 | 99.99% |
| 129 | 338 | 30 | 2    | 1.5 | 500 | 99.99% |
| 130 | 338 | 30 | 2    | 1.5 | 500 | 98.98% |
| 131 | 338 | 30 | 2    | 1.5 | 500 | 98.98% |
| 132 | 338 | 30 | 2    | 1.5 | 500 | 98.98% |
| 133 | 338 | 30 | 2    | 1.5 | 500 | 99.36% |
| 134 | 338 | 30 | 2    | 1.5 | 500 | 99.36% |
| 135 | 338 | 30 | 2    | 1.5 | 500 | 97.93% |
| 136 | 338 | 30 | 2    | 1.5 | 500 | 97.87% |
| 137 | 338 | 30 | 2    | 1.5 | 500 | 99.30% |
| 138 | 338 | 30 | 2    | 1.5 | 500 | 99.30% |
| 139 | 338 | 30 | 1.75 | 1.5 | 500 | 90.44% |
| 140 | 338 | 30 | 1.75 | 1.5 | 500 | 87.65% |
| 141 | 338 | 30 | 1.75 | 1.5 | 500 | 93.24% |
| 142 | 298 | 50 | 2    | 2   | 0   | 65.34% |
| 143 | 298 | 50 | 2    | 2   | 0   | 63.95% |
| 144 | 298 | 50 | 2    | 2   | 0   | 65.07% |
| 145 | 308 | 50 | 2    | 2   | 0   | 66.77% |
| 146 | 308 | 50 | 2    | 2   | 0   | 71.00% |
| 147 | 308 | 50 | 2    | 2   | 0   | 69.59% |
| 148 | 318 | 50 | 2    | 2   | 0   | 75.23% |
| 149 | 318 | 50 | 2    | 2   | 0   | 73.82% |
| 150 | 328 | 50 | 2    | 2   | 0   | 75.94% |
| 151 | 328 | 50 | 2    | 2   | 0   | 78.05% |
| 152 | 328 | 50 | 2    | 2   | 0   | 79.47% |
| 153 | 338 | 50 | 2    | 2   | 0   | 80.88% |
| 154 | 338 | 50 | 2    | 2   | 0   | 82.76% |
| 155 | 338 | 50 | 2    | 2   | 0   | 84.64% |
| 156 | 338 | 50 | 2    | 2   | 0   | 83.70% |
| 157 | 338 | 30 | 2    | 2   | 0   | 81.31% |
| 158 | 338 | 30 | 2    | 2   | 0   | 84.19% |
| 159 | 338 | 30 | 2    | 2   | 0   | 81.31% |
| 160 | 338 | 40 | 2    | 2   | 0   | 79.87% |

|     |     |    |      |      |   |        |
|-----|-----|----|------|------|---|--------|
| 161 | 338 | 40 | 2    | 2    | 0 | 78.43% |
| 162 | 338 | 40 | 2    | 2    | 0 | 79.87% |
| 163 | 338 | 50 | 2    | 2    | 0 | 78.43% |
| 164 | 338 | 50 | 2    | 2    | 0 | 78.43% |
| 165 | 338 | 50 | 2    | 2    | 0 | 76.99% |
| 166 | 338 | 60 | 2    | 2    | 0 | 76.99% |
| 167 | 338 | 60 | 2    | 2    | 0 | 75.55% |
| 168 | 338 | 60 | 2    | 2    | 0 | 75.55% |
| 169 | 338 | 70 | 2    | 2    | 0 | 75.55% |
| 170 | 338 | 70 | 2    | 2    | 0 | 74.11% |
| 171 | 338 | 70 | 2    | 2    | 0 | 72.67% |
| 172 | 338 | 30 | 1.5  | 2    | 0 | 78.36% |
| 173 | 338 | 30 | 1.5  | 2    | 0 | 75.48% |
| 174 | 338 | 30 | 1.5  | 2    | 0 | 78.36% |
| 175 | 338 | 30 | 1.75 | 2    | 0 | 78.38% |
| 176 | 338 | 30 | 1.75 | 2    | 0 | 78.38% |
| 177 | 338 | 30 | 1.75 | 2    | 0 | 75.50% |
| 178 | 338 | 30 | 2    | 2    | 0 | 81.31% |
| 179 | 338 | 30 | 2    | 2    | 0 | 84.19% |
| 180 | 338 | 30 | 2    | 2    | 0 | 81.31% |
| 181 | 338 | 30 | 2.25 | 2    | 0 | 79.89% |
| 182 | 338 | 30 | 2.25 | 2    | 0 | 78.45% |
| 183 | 338 | 30 | 2.25 | 2    | 0 | 77.01% |
| 184 | 338 | 30 | 2.5  | 2    | 0 | 75.50% |
| 185 | 338 | 30 | 2.5  | 2    | 0 | 78.38% |
| 186 | 338 | 30 | 2.5  | 2    | 0 | 79.82% |
| 187 | 338 | 30 | 2    | 1.5  | 0 | 85.65% |
| 188 | 338 | 30 | 2    | 1.5  | 0 | 84.21% |
| 189 | 338 | 30 | 2    | 1.5  | 0 | 82.77% |
| 190 | 338 | 30 | 2    | 1.75 | 0 | 82.75% |
| 191 | 338 | 30 | 2    | 1.75 | 0 | 82.75% |
| 192 | 338 | 30 | 2    | 1.75 | 0 | 84.19% |
| 193 | 338 | 30 | 2    | 2    | 0 | 81.31% |

|     |     |    |   |      |     |        |
|-----|-----|----|---|------|-----|--------|
| 194 | 338 | 30 | 2 | 2    | 0   | 84.19% |
| 195 | 338 | 30 | 2 | 2    | 0   | 81.31% |
| 196 | 338 | 30 | 2 | 2.25 | 0   | 79.84% |
| 197 | 338 | 30 | 2 | 2.25 | 0   | 81.28% |
| 198 | 338 | 30 | 2 | 2.25 | 0   | 81.28% |
| 199 | 338 | 30 | 2 | 2.5  | 0   | 79.87% |
| 200 | 338 | 30 | 2 | 2.5  | 0   | 78.43% |
| 201 | 338 | 30 | 2 | 2.5  | 0   | 79.87% |
| 202 | 338 | 30 | 2 | 1.5  | 0   | 81.31% |
| 203 | 338 | 30 | 2 | 1.5  | 0   | 84.19% |
| 204 | 338 | 30 | 2 | 1.5  | 0   | 81.31% |
| 205 | 338 | 30 | 2 | 1.5  | 100 | 87.09% |
| 206 | 338 | 30 | 2 | 1.5  | 100 | 85.65% |
| 207 | 338 | 30 | 2 | 1.5  | 100 | 85.65% |
| 208 | 338 | 30 | 2 | 1.5  | 200 | 87.07% |
| 209 | 338 | 30 | 2 | 1.5  | 200 | 88.51% |
| 210 | 338 | 30 | 2 | 1.5  | 200 | 88.51% |
| 211 | 338 | 30 | 2 | 1.5  | 300 | 89.92% |
| 212 | 338 | 30 | 2 | 1.5  | 300 | 92.80% |
| 213 | 338 | 30 | 2 | 1.5  | 300 | 91.36% |
| 214 | 338 | 30 | 2 | 1.5  | 400 | 92.83% |
| 215 | 338 | 30 | 2 | 1.5  | 400 | 94.28% |
| 216 | 338 | 30 | 2 | 1.5  | 400 | 92.83% |
| 217 | 338 | 30 | 2 | 1.5  | 500 | 95.72% |
| 218 | 338 | 30 | 2 | 1.5  | 500 | 94.28% |
| 219 | 338 | 30 | 2 | 1.5  | 500 | 95.72% |
| 220 | 298 | 30 | 2 | 1.5  | 0   | 54.22% |
| 221 | 298 | 30 | 2 | 1.5  | 0   | 52.91% |
| 222 | 298 | 30 | 2 | 1.5  | 0   | 52.91% |
| 223 | 298 | 30 | 2 | 1.5  | 0   | 53.92% |
| 224 | 298 | 30 | 2 | 1.5  | 0   | 55.90% |
| 225 | 298 | 30 | 2 | 1.5  | 0   | 55.12% |
| 226 | 298 | 30 | 2 | 1.5  | 0   | 56.70% |

|     |     |    |   |     |   |        |
|-----|-----|----|---|-----|---|--------|
| 227 | 298 | 30 | 2 | 1.5 | 0 | 54.73% |
| 228 | 298 | 30 | 2 | 1.5 | 0 | 55.70% |
| 229 | 298 | 30 | 2 | 1.5 | 0 | 55.39% |
| 230 | 298 | 30 | 2 | 1.5 | 0 | 57.31% |
| 231 | 298 | 30 | 2 | 1.5 | 0 | 56.44% |
| 232 | 298 | 30 | 2 | 1.5 | 0 | 58.81% |
| 233 | 298 | 30 | 2 | 1.5 | 0 | 56.83% |
| 234 | 298 | 30 | 2 | 1.5 | 0 | 57.88% |
| 235 | 298 | 30 | 2 | 1.5 | 0 | 59.20% |
| 236 | 298 | 30 | 2 | 1.5 | 0 | 57.25% |
| 237 | 298 | 30 | 2 | 1.5 | 0 | 58.24% |
| 238 | 308 | 30 | 2 | 1.5 | 0 | 61.10% |
| 239 | 308 | 30 | 2 | 1.5 | 0 | 59.11% |
| 240 | 308 | 30 | 2 | 1.5 | 0 | 60.15% |
| 241 | 308 | 30 | 2 | 1.5 | 0 | 62.45% |
| 242 | 308 | 30 | 2 | 1.5 | 0 | 60.48% |
| 243 | 308 | 30 | 2 | 1.5 | 0 | 61.48% |
| 244 | 308 | 30 | 2 | 1.5 | 0 | 63.50% |
| 245 | 308 | 30 | 2 | 1.5 | 0 | 61.53% |
| 246 | 308 | 30 | 2 | 1.5 | 0 | 62.53% |
| 247 | 308 | 30 | 2 | 1.5 | 0 | 64.01% |
| 248 | 308 | 30 | 2 | 1.5 | 0 | 62.04% |
| 249 | 308 | 30 | 2 | 1.5 | 0 | 63.04% |
| 250 | 308 | 30 | 2 | 1.5 | 0 | 64.99% |
| 251 | 308 | 30 | 2 | 1.5 | 0 | 63.02% |
| 252 | 308 | 30 | 2 | 1.5 | 0 | 64.02% |
| 253 | 308 | 30 | 2 | 1.5 | 0 | 66.07% |
| 254 | 308 | 30 | 2 | 1.5 | 0 | 64.10% |
| 255 | 308 | 30 | 2 | 1.5 | 0 | 65.10% |
| 256 | 318 | 30 | 2 | 1.5 | 0 | 64.33% |
| 257 | 318 | 30 | 2 | 1.5 | 0 | 62.36% |
| 258 | 318 | 30 | 2 | 1.5 | 0 | 63.36% |
| 259 | 318 | 30 | 2 | 1.5 | 0 | 65.03% |

|     |     |    |   |     |   |        |
|-----|-----|----|---|-----|---|--------|
| 260 | 318 | 30 | 2 | 1.5 | 0 | 63.06% |
| 261 | 318 | 30 | 2 | 1.5 | 0 | 64.06% |
| 262 | 318 | 30 | 2 | 1.5 | 0 | 66.05% |
| 263 | 318 | 30 | 2 | 1.5 | 0 | 64.08% |
| 264 | 318 | 30 | 2 | 1.5 | 0 | 65.08% |
| 265 | 318 | 30 | 2 | 1.5 | 0 | 67.30% |
| 266 | 318 | 30 | 2 | 1.5 | 0 | 65.33% |
| 267 | 318 | 30 | 2 | 1.5 | 0 | 66.33% |
| 268 | 318 | 30 | 2 | 1.5 | 0 | 68.39% |
| 269 | 318 | 30 | 2 | 1.5 | 0 | 66.42% |
| 270 | 318 | 30 | 2 | 1.5 | 0 | 67.42% |
| 271 | 318 | 30 | 2 | 1.5 | 0 | 69.65% |
| 272 | 318 | 30 | 2 | 1.5 | 0 | 67.68% |
| 273 | 318 | 30 | 2 | 1.5 | 0 | 68.68% |
| 274 | 328 | 30 | 2 | 1.5 | 0 | 67.63% |
| 275 | 328 | 30 | 2 | 1.5 | 0 | 65.66% |
| 276 | 328 | 30 | 2 | 1.5 | 0 | 66.66% |
| 277 | 328 | 30 | 2 | 1.5 | 0 | 68.64% |
| 278 | 328 | 30 | 2 | 1.5 | 0 | 66.67% |
| 279 | 328 | 30 | 2 | 1.5 | 0 | 67.67% |
| 280 | 328 | 30 | 2 | 1.5 | 0 | 69.30% |
| 281 | 328 | 30 | 2 | 1.5 | 0 | 67.33% |
| 282 | 328 | 30 | 2 | 1.5 | 0 | 68.33% |
| 283 | 328 | 30 | 2 | 1.5 | 0 | 70.52% |
| 284 | 328 | 30 | 2 | 1.5 | 0 | 68.55% |
| 285 | 328 | 30 | 2 | 1.5 | 0 | 69.55% |
| 286 | 328 | 30 | 2 | 1.5 | 0 | 71.18% |
| 287 | 328 | 30 | 2 | 1.5 | 0 | 69.21% |
| 288 | 328 | 30 | 2 | 1.5 | 0 | 70.21% |
| 289 | 328 | 30 | 2 | 1.5 | 0 | 72.32% |
| 290 | 328 | 30 | 2 | 1.5 | 0 | 70.35% |
| 291 | 328 | 30 | 2 | 1.5 | 0 | 71.35% |
| 292 | 338 | 30 | 2 | 1.5 | 0 | 72.15% |

|     |     |    |   |     |     |        |
|-----|-----|----|---|-----|-----|--------|
| 293 | 338 | 30 | 2 | 1.5 | 0   | 70.18% |
| 294 | 338 | 30 | 2 | 1.5 | 0   | 71.18% |
| 295 | 338 | 30 | 2 | 1.5 | 0   | 72.55% |
| 296 | 338 | 30 | 2 | 1.5 | 0   | 70.58% |
| 297 | 338 | 30 | 2 | 1.5 | 0   | 71.58% |
| 298 | 338 | 30 | 2 | 1.5 | 0   | 73.10% |
| 299 | 338 | 30 | 2 | 1.5 | 0   | 71.13% |
| 300 | 338 | 30 | 2 | 1.5 | 0   | 72.13% |
| 301 | 338 | 30 | 2 | 1.5 | 0   | 74.21% |
| 302 | 338 | 30 | 2 | 1.5 | 0   | 72.24% |
| 303 | 338 | 30 | 2 | 1.5 | 0   | 73.24% |
| 304 | 338 | 30 | 2 | 1.5 | 0   | 75.75% |
| 305 | 338 | 30 | 2 | 1.5 | 0   | 73.78% |
| 306 | 338 | 30 | 2 | 1.5 | 0   | 74.78% |
| 307 | 338 | 30 | 2 | 1.5 | 0   | 76.96% |
| 308 | 338 | 30 | 2 | 1.5 | 0   | 74.99% |
| 309 | 338 | 30 | 2 | 1.5 | 0   | 75.99% |
| 310 | 298 | 30 | 2 | 1.5 | 500 | 68.22% |
| 311 | 298 | 30 | 2 | 1.5 | 500 | 66.25% |
| 312 | 298 | 30 | 2 | 1.5 | 500 | 67.25% |
| 313 | 298 | 30 | 2 | 1.5 | 500 | 70.29% |
| 314 | 298 | 30 | 2 | 1.5 | 500 | 68.32% |
| 315 | 298 | 30 | 2 | 1.5 | 500 | 69.32% |
| 316 | 298 | 30 | 2 | 1.5 | 500 | 72.20% |
| 317 | 298 | 30 | 2 | 1.5 | 500 | 70.23% |
| 318 | 298 | 30 | 2 | 1.5 | 500 | 71.23% |
| 319 | 298 | 30 | 2 | 1.5 | 500 | 74.22% |
| 320 | 298 | 30 | 2 | 1.5 | 500 | 72.25% |
| 321 | 298 | 30 | 2 | 1.5 | 500 | 73.25% |
| 322 | 298 | 30 | 2 | 1.5 | 500 | 76.74% |
| 323 | 298 | 30 | 2 | 1.5 | 500 | 74.77% |
| 324 | 298 | 30 | 2 | 1.5 | 500 | 75.77% |
| 325 | 298 | 30 | 2 | 1.5 | 500 | 77.73% |

|     |     |    |   |     |     |        |
|-----|-----|----|---|-----|-----|--------|
| 326 | 298 | 30 | 2 | 1.5 | 500 | 75.76% |
| 327 | 298 | 30 | 2 | 1.5 | 500 | 76.75% |
| 328 | 308 | 30 | 2 | 1.5 | 500 | 70.02% |
| 329 | 308 | 30 | 2 | 1.5 | 500 | 68.05% |
| 330 | 308 | 30 | 2 | 1.5 | 500 | 69.06% |
| 331 | 308 | 30 | 2 | 1.5 | 500 | 73.32% |
| 332 | 308 | 30 | 2 | 1.5 | 500 | 71.35% |
| 333 | 308 | 30 | 2 | 1.5 | 500 | 72.35% |
| 334 | 308 | 30 | 2 | 1.5 | 500 | 75.45% |
| 335 | 308 | 30 | 2 | 1.5 | 500 | 73.48% |
| 336 | 308 | 30 | 2 | 1.5 | 500 | 74.48% |
| 337 | 308 | 30 | 2 | 1.5 | 500 | 77.36% |
| 338 | 308 | 30 | 2 | 1.5 | 500 | 75.39% |
| 339 | 308 | 30 | 2 | 1.5 | 500 | 76.39% |
| 340 | 308 | 30 | 2 | 1.5 | 500 | 78.72% |
| 341 | 308 | 30 | 2 | 1.5 | 500 | 76.75% |
| 342 | 308 | 30 | 2 | 1.5 | 500 | 77.75% |
| 343 | 308 | 30 | 2 | 1.5 | 500 | 80.38% |
| 344 | 308 | 30 | 2 | 1.5 | 500 | 78.41% |
| 345 | 308 | 30 | 2 | 1.5 | 500 | 79.41% |
| 346 | 318 | 30 | 2 | 1.5 | 500 | 71.73% |
| 347 | 318 | 30 | 2 | 1.5 | 500 | 69.76% |
| 348 | 318 | 30 | 2 | 1.5 | 500 | 70.77% |
| 349 | 318 | 30 | 2 | 1.5 | 500 | 74.98% |
| 350 | 318 | 30 | 2 | 1.5 | 500 | 73.01% |
| 351 | 318 | 30 | 2 | 1.5 | 500 | 74.02% |
| 352 | 318 | 30 | 2 | 1.5 | 500 | 76.58% |
| 353 | 318 | 30 | 2 | 1.5 | 500 | 74.61% |
| 354 | 318 | 30 | 2 | 1.5 | 500 | 75.61% |
| 355 | 318 | 30 | 2 | 1.5 | 500 | 78.96% |
| 356 | 318 | 30 | 2 | 1.5 | 500 | 76.99% |
| 357 | 318 | 30 | 2 | 1.5 | 500 | 77.99% |
| 358 | 318 | 30 | 2 | 1.5 | 500 | 80.72% |

|     |     |    |   |     |     |        |
|-----|-----|----|---|-----|-----|--------|
| 359 | 318 | 30 | 2 | 1.5 | 500 | 78.75% |
| 360 | 318 | 30 | 2 | 1.5 | 500 | 79.75% |
| 361 | 318 | 30 | 2 | 1.5 | 500 | 82.93% |
| 362 | 318 | 30 | 2 | 1.5 | 500 | 80.96% |
| 363 | 318 | 30 | 2 | 1.5 | 500 | 81.96% |
| 364 | 328 | 30 | 2 | 1.5 | 500 | 73.39% |
| 365 | 328 | 30 | 2 | 1.5 | 500 | 71.42% |
| 366 | 328 | 30 | 2 | 1.5 | 500 | 72.42% |
| 367 | 328 | 30 | 2 | 1.5 | 500 | 77.10% |
| 368 | 328 | 30 | 2 | 1.5 | 500 | 75.13% |
| 369 | 328 | 30 | 2 | 1.5 | 500 | 76.13% |
| 370 | 328 | 30 | 2 | 1.5 | 500 | 79.19% |
| 371 | 328 | 30 | 2 | 1.5 | 500 | 77.22% |
| 372 | 328 | 30 | 2 | 1.5 | 500 | 78.22% |
| 373 | 328 | 30 | 2 | 1.5 | 500 | 81.10% |
| 374 | 328 | 30 | 2 | 1.5 | 500 | 79.13% |
| 375 | 328 | 30 | 2 | 1.5 | 500 | 80.13% |
| 376 | 328 | 30 | 2 | 1.5 | 500 | 82.96% |
| 377 | 328 | 30 | 2 | 1.5 | 500 | 80.99% |
| 378 | 328 | 30 | 2 | 1.5 | 500 | 81.99% |
| 379 | 328 | 30 | 2 | 1.5 | 500 | 84.89% |
| 380 | 328 | 30 | 2 | 1.5 | 500 | 82.92% |
| 381 | 328 | 30 | 2 | 1.5 | 500 | 83.92% |
| 382 | 338 | 30 | 2 | 1.5 | 500 | 75.90% |
| 383 | 338 | 30 | 2 | 1.5 | 500 | 73.93% |
| 384 | 338 | 30 | 2 | 1.5 | 500 | 74.93% |
| 385 | 338 | 30 | 2 | 1.5 | 500 | 79.19% |
| 386 | 338 | 30 | 2 | 1.5 | 500 | 77.22% |
| 387 | 338 | 30 | 2 | 1.5 | 500 | 78.22% |
| 388 | 338 | 30 | 2 | 1.5 | 500 | 81.22% |
| 389 | 338 | 30 | 2 | 1.5 | 500 | 79.25% |
| 390 | 338 | 30 | 2 | 1.5 | 500 | 80.25% |
| 391 | 338 | 30 | 2 | 1.5 | 500 | 83.21% |

|     |     |    |   |     |     |        |
|-----|-----|----|---|-----|-----|--------|
| 392 | 338 | 30 | 2 | 1.5 | 500 | 81.24% |
| 393 | 338 | 30 | 2 | 1.5 | 500 | 82.24% |
| 394 | 338 | 30 | 2 | 1.5 | 500 | 85.78% |
| 395 | 338 | 30 | 2 | 1.5 | 500 | 83.81% |
| 396 | 338 | 30 | 2 | 1.5 | 500 | 84.81% |
| 397 | 338 | 30 | 2 | 1.5 | 500 | 87.19% |
| 398 | 338 | 30 | 2 | 1.5 | 500 | 85.22% |
| 399 | 338 | 30 | 2 | 1.5 | 500 | 86.22% |

**Table S4.** Comparison between BP-ANN Predicted Conditions and Experimental Sulfuration Efficiency.

| Times            | 1      | 2      | 3      | 4      | 5      | 6      |
|------------------|--------|--------|--------|--------|--------|--------|
| Predicted values | 98.73% | 98.73% | 98.73% | 98.73% | 98.73% | 98.73% |
| Actual values    | 97.82% | 98.01% | 97.56% | 97.21% | 98.33% | 97.98% |

## Energy Inventory and Environmental Implication Assessment

To rigorously evaluate the industrial sustainability of the proposed "Ultrasound-Enhanced Transformation–Solid Phase Electrolysis" strategy, a gate-to-gate energy inventory analysis was conducted based on a functional unit of 1 ton of metallic lead (Pb) produced. While the laboratory-scale data confirm a significant reduction in electrolysis energy consumption (35.8%, from 879.96 to 565.08 kWh·t<sup>-1</sup>·Pb), a holistic assessment must account for the auxiliary energy inputs introduced by the ultrasonic pretreatment and thermal regulation.

### (1) Scale-up Assumptions and Energy Balance

Direct linear extrapolation of laboratory energy data (e.g., 600 W ultrasonic power for 10 g paste) often leads to overestimated values due to the low energy efficiency of probe-type sonication systems. For industrial implementation, we assume the deployment of mature large-scale sonochemical reactors with a specific energy consumption of approximately 80–100 kWh·m<sup>3</sup>. Furthermore, regarding the thermal requirement to maintain the reaction at 347.97 K, industrial hydrometallurgical circuits typically employ heat exchangers to recover waste heat from the exothermic acid dilution and the Joule heating of electrolytic cells. Assuming a conservative industrial heat recovery efficiency ( $\eta_{rec}$ ) of 70%, the net thermal energy input for the pretreatment

---

stage is significantly mitigated.

(2) Decarbonization and technical advantages

**Table S5** presents a comparative analysis of the proposed route against traditional pyrometallurgy and direct solid-phase electrolysis. Although the inclusion of pretreatment steps introduces an additional energy penalty, the total equivalent energy consumption of the proposed process remains competitive. Crucially, this strategy offers two decisive advantages that justify the thermodynamic trade-off:

(1) Elimination of Refractory Phases: By converting the mixed phases (PbO<sub>2</sub>/PbO) into a unitary PbSO<sub>4</sub> precursor, the process eliminates the high overpotential and parasitic side reactions (e.g., oxygen evolution) associated with the direct electrolysis of PbO<sub>2</sub>. This ensures a stable current efficiency of 90.80% and a high lead recovery rate of 98.68%.

(2) Scope 1 Emissions Reduction: Unlike pyrometallurgical smelting, which relies on the combustion of coke and emits substantial CO<sub>2</sub> and lead dust, the proposed route is fully electrified. Quantitatively, traditional smelting emits approx. 0.4–0.6 tons of direct CO<sub>2</sub> per ton of lead (stoichiometrically derived from  $2\text{PbO} + \text{C} \rightarrow 2\text{Pb} + \text{CO}_2$ ). By replacing carbon reduction with electron transfer ( $\text{PbSO}_4 + 2\text{e}^- \rightarrow \text{Pb} + \text{SO}_4^{2-}$ ), this direct emission is mathematically reduced to zero in the proposed process. Although indirect emissions (Scope 2) depend on the grid mix, the elimination of the intrinsic carbon reductant represents a permanent decarbonization of the process chemistry. This shifts the carbon footprint from direct Scope 1 emissions to Scope 2 (electricity generation), offering a pathway to near-zero carbon emissions as industrial grids transition to renewable energy sources.

(3) Economic Implications (OPEX and CAPEX)

Economically, the framework offers a highly competitive Operational Expenditure (OPEX) profile. While the sonochemical pretreatment introduces front-end reagent costs for H<sub>2</sub>O<sub>2</sub> and H<sub>2</sub>SO<sub>4</sub>, these expenses are structurally offset by the downstream electrical efficiency. The absolute energy saving of 314.88 kWh·t<sup>-1</sup> Pb provides substantial and continuous cost mitigation at standard industrial electricity rates. Moreover, the (NH<sub>4</sub>)<sub>2</sub>SO<sub>4</sub> electrolyte acts as a stable, non-consumable supporting medium; after routine pH neutralization, it can be continuously recycled, minimizing ongoing chemical makeup costs. From a Capital Expenditure (CAPEX) perspective, this low-temperature hydrometallurgical route circumvents the need for massive investments in high-temperature rotary furnaces and the stringent off-gas treatment

infrastructure (e.g., desulfurization scrubbers and lead dust baghouses) mandated for conventional pyrometallurgy. This integrated approach thus presents a compelling, quantified economic case for scalable secondary lead recovery.

**Table S5.** Comparative estimation of technical and environmental indicators for 1 ton of Pb production.

| Indicator                                     | Pyrometallurgical Smelting       | Direct Solid-Phase Electrolysis                | This Work (Ultrasonic-Enhanced)        |
|-----------------------------------------------|----------------------------------|------------------------------------------------|----------------------------------------|
| Primary Energy Source                         | Coke/Coal + Electricity          | Electricity                                    | Electricity                            |
| Reaction Temperature                          | >1273 K                          | Ambient (298 K)                                | 347.97 K (Pretreatment) + Electrolysis |
| Electrolysis Energy (kWh·t <sup>-1</sup> ·Pb) | N/A (Refining step only)         | 879.96                                         | 565.08                                 |
| Product Purity & Morphology                   | Lead Bullion (Requires refining) | Sponge Pb (Risk of PbO <sub>2</sub> inclusion) | High-Purity Sponge Pb                  |
| Direct CO <sub>2</sub> Emissions              | High (Carbothermal reduction)    | Low                                            | Negligible                             |
| Process Stability                             | Mature but high pollution        | Unstable (Anode passivation)                   | High (Unitary phase precursor)         |

In conclusion, although the ultrasonic pretreatment introduces an energy penalty, the sharp decrease in electrolysis specific energy consumption (SEC) and the superior product quality justify the trade-off. The process offers a technically viable pathway to electrify the lead recycling industry, aligning with carbon neutrality mandates. Nevertheless, we acknowledge that the current assessment is based on theoretical scale-up assumptions. The precise quantification of specific energy consumption for the pretreatment unit, particularly the optimization of heat recovery efficiency and ultrasonic reactor design at the pilot scale, remains a critical objective for our future research.

## Experimental sections

### Materials and chemical reagents

All chemicals used in this study were of analytical grade.  $\text{H}_2\text{SO}_4$  was purchased from Chongqing Chuandong Chemical Co., Ltd., and  $\text{H}_2\text{O}_2$  was obtained from Chengdu cologne chemicals Co., Ltd. All aqueous solutions were prepared using ultrapure water (Millipore,  $\geq 18 \text{ M}\Omega\cdot\text{cm}$ ).

The SLP used in this work was supplied by Yunnan Xiangyun Feilong recycling technology Co., Ltd. Prior to experiments, the SLP was ground for 6 hours using a planetary ball mill (MITR, YXQM-2L), dried, and sieved through a 200-mesh screen to obtain a homogeneous powder.

### Ultrasound-assisted phase conversion

The phase transformation was performed in a thermostated acoustic reactor. Pretreated SLP powder (10 g) was dispersed in 150 mL of distilled water. The stoichiometry was rigorously controlled by adding 10 wt.%  $\text{H}_2\text{O}_2$  (molar ratio  $\text{H}_2\text{O}_2/\text{Pb}^{4+}$ ) and 10% dilute  $\text{H}_2\text{SO}_4$  (molar ratio  $\text{H}_2\text{SO}_4/\text{Pb}^{2+}$ ) to prevent premature precipitation. The slurry was subjected to ultrasonic irradiation (19.48 kHz) at variable powers (0–800 W) for 2 h. post-reaction, the solid residue was filtered, washed to neutrality, and dried for compositional analysis. The conversion efficiency ( $w$ ) was quantified using Eq. (1). A schematic of the SLP transformation process is shown in **Figure S6**.

$$w = \frac{m_2 - m_1}{m - m_1} \times 100\% \quad (1)$$

where  $w$  represents the conversion efficiency of Pb in SLP (%),  $m$  is the mass of SLP used (g),  $m_1$  is the mass of  $\text{PbSO}_4$  contained in the SLP (g), and  $m_2$  is the mass of the recovered  $\text{PbSO}_4$  (g).

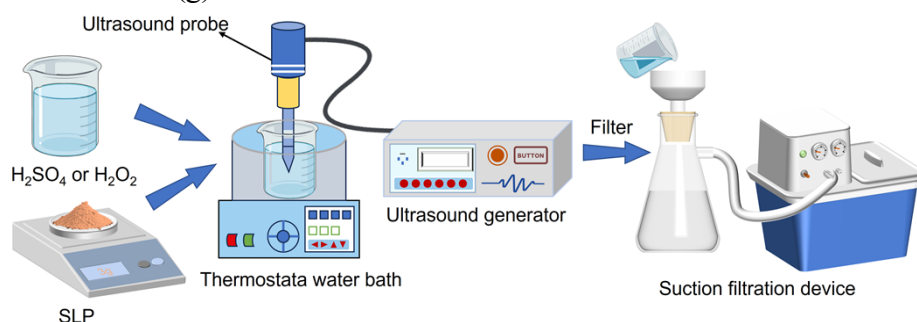

**Figure S3.** Illustration of conversion process of SLP.

### Solid phase electroreduction

SLP cathodes were prepared on lead-based grids using a conventional coating

method. First, 10 g of sulfured SLP from the previous step was dry-mixed with short cellulose fibers in a mortar for 30 min. An appropriate amount of deionized water was then added, and the mixture was stirred for 5 min to form a homogeneous slurry. The SLP mixture was uniformly coated onto grid-shaped lead plates (40 mm × 28 mm × 1 mm) using a stainless-steel blade to level the surface, and the coated cathodes were dried in a vacuum oven at 80 °C for 8 h.

The anodes consisted of Ti plates coated with Sn-Sb (40 mm × 30 mm × 1 mm, Ti/SnO<sub>2</sub>-Sb<sub>2</sub>O<sub>3</sub>). The Ti substrate was first roughened via sandblasting to enhance coating adhesion, followed by acid etching in a HCl mixture (V<sub>HF</sub>/V<sub>HNO<sub>3</sub></sub>/V<sub>H<sub>2</sub>O</sub> = 1:4:5) to remove the oxide layer and improve surface cleanliness. Multi-layer nanoscale Sn-Sb coatings were then applied through multiple quantitative coatings and high-temperature sintering.

Solid-phase electrolysis experiments were performed in an electronically controlled thermostatic water bath using a HHB17301SL DC power supply to regulate cathodic current density. The electrolysis employed an electrolyte of 200 g/L (NH<sub>4</sub>)<sub>2</sub>SO<sub>4</sub> and a current density of 200 A/m<sup>2</sup>, utilizing an SLP cathode and a Ti/SnO<sub>2</sub>-Sb<sub>2</sub>O<sub>3</sub> anode positioned 50 mm apart. During electrolysis, the cell voltage was recorded over time, and changes in the cathode surface were observed. Electrolysis was terminated when a sharp rise in cell voltage accompanied by vigorous H<sub>2</sub> evolution indicated completion. The cathode was then removed, thoroughly washed, and dried under vacuum to prevent lead oxidation. A schematic of the SLP solid-phase electrolysis setup is shown in **Figure S4**.

The key parameters of the Solid-phase electrolysis process were calculated as follows:

The average cell voltage ( $\bar{U}$ ) was determined using the following equation:

$$\bar{U} = \frac{\int U dt}{t} \quad (2)$$

In the equation,  $U$ (V) represents the real-time cell voltage, and  $t$  (s) is the electrolysis time.

The charge required to process one ton of Pb ( $Q_0$ , C·t<sup>-1</sup> Pb) was calculated as follows:

$$Q_0 = \frac{\Delta Q}{\Delta m} = \frac{\int I A dt}{m} \times 10^3 \quad (3)$$

In the equation,  $I$ (mA/cm<sup>2</sup>) is the current density,  $A$ (cm<sup>2</sup>) is the electrode area, and

$m(g)$  is the mass of metallic Pb, determined by weighing.

The energy consumption ( $E_0$ , kWh·t<sup>-1</sup>·Pb) of the Solid-phase electrolysis process was calculated according to Eq. (4):

$$E_0 = \frac{\Delta E}{\Delta m} = \frac{1}{3600} \cdot \frac{\int UIAdt}{m} = \frac{1}{3.6 \times 10^6} \cdot \bar{U} \cdot Q_0 \quad (4)$$

The cathodic current efficiency ( $\eta$ ,%) of the Solid-phase electrolysis was calculated using Eq. 5:

$$\eta = \frac{m/M_{Pb}}{\Delta Q/(zF)} \times 100\% = \frac{zF}{M_{Pb}Q_0} \times 100\% \quad (5)$$

In the equation,  $F$  is the Faraday constant ( $F=96485 \text{ C}\cdot\text{mol}^{-1}$ ),  $M_{Pb}$  is the molar mass of Pb ( $M_{Pb}=207 \text{ g}\cdot\text{mol}^{-1}$ ), and  $z$  is the number of electrons required to obtain a Pb atom, where  $m(g)$  is the mass of metallic Pb obtained,  $m_0(g)$  is the mass of the original SLP coated on the cathode, and  $\lambda_0$  (wt.%) is the Pb content in the original SLP, determined by EDTA titration.

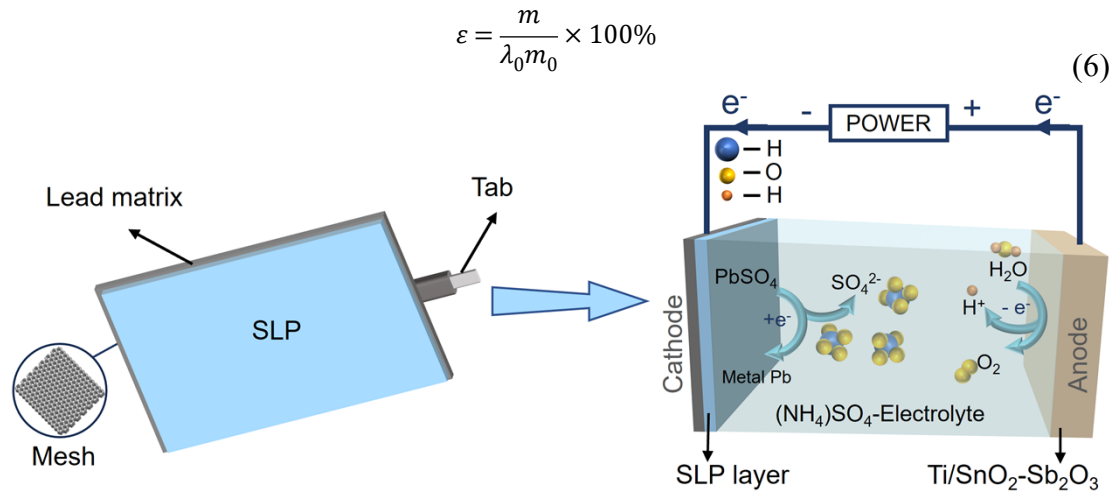

**Figure S4.** The process of solid-phase electrolysis

### Physical characterization

X-ray diffraction (XRD) patterns were collected on an Empyrean-100 (PANalytical, Netherlands) diffractometer equipped with a Cu K $\alpha$  radiation source ( $\lambda = 1.5406 \text{ \AA}$ ) operating at 40 mA and 40 kV. The microstructure of all samples was observed with a JSM-7900F field emission scanning electron microscope (SEM) with energy dispersive spectroscopy (EDS). X-ray photoelectron spectroscopy (XPS) tests were carried out on the Thermo fisher Escalab 250 Xi+ (Thermofisher, USA), Multipak software was employed to fit the XPS data. The C 1s peak at 284.8 eV was commonly used as a reference for charge correction.

---

## Computational methods

First-principles calculations based on Density Functional Theory (DFT) were performed to elucidate the electronic structure and bonding characteristics of lead species. The calculations were carried out using the Vienna Ab initio Simulation Package (VASP). The detailed parameters, including the exchange-correlation functional, cutoff energy, and k-point sampling, are provided following:

All Density Functional Theory (DFT) calculations were performed using the Vienna Ab initio Simulation Package (VASP) <sup>[1,2]</sup>. The projector augmented wave (PAW) method was employed to describe the ion-electron interactions <sup>[3]</sup>. The exchange-correlation energy was treated within the Generalized Gradient Approximation (GGA) using the Perdew-Burke-Ernzerhof (PBE) functional <sup>[4]</sup>.

For the structural optimization and electronic property calculations of PbO<sub>2</sub> (rutile), PbO (litharge), and PbSO<sub>4</sub> (anglesite), a plane-wave basis set with a cutoff energy of 500 eV was used. The Brillouin zone was sampled using the Monkhorst-Pack scheme with a grid density of  $4 \times 4 \times 4$  for bulk calculations <sup>[5]</sup>. The convergence criteria for energy and force were set to  $10^{-5}$  eV and 0.02 eV/Å, respectively.

To analyze the bonding characteristics, the Density of States (DOS) and Band Structure were calculated. The Electron Localization Function (ELF) and Differential Charge Density (DCD) were visualized using the VESTA software to qualitatively distinguish between the covalent and ionic bonding nature of the lead compounds <sup>[6]</sup>.

References:

- [1] G. Kresse, J. Furthmüller, Phys. Rev. B 54 (1996) 11169.
- [2] G. Kresse, D. Joubert, Phys. Rev. B 59 (1999) 1758.
- [3] P.E. Blöchl, Phys. Rev. B 50 (1994) 17953.
- [4] J.P. Perdew, K. Burke, M. Ernzerhof, Phys. Rev. Lett. 77 (1996) 3865.
- [5] H.J. Monkhorst, J.D. Pack, Phys. Rev. B 13 (1976) 5188.
- [6] K. Momma, F. Izumi, J. Appl. Crystallogr. 44 (2011) 1272.
